# Supplementary material for: One-step synthesis of CePO4 nanoparticle-decorated cerium-doped ultralong flexible hydroxyapatite nanofibers
Source: Royal Society of Chemistry journal article supplement (doi:10.1039/d3ce00561e), 2023-01-01
Supplement: d3ce00561e1.pdf [file d3ce00561e1.pdf]

**Electronic Supplementary Information for the Manuscript:**

**One-step Synthesis of CePO<sub>4</sub> nanoparticle-Decorated Cerium-doped Ultralong Flexible Hydroxyapatite Nanofibers**

Yin-chuan Wang<sup>1,2</sup>, Gui-yong Xiao<sup>2,\*</sup>, and Yu-peng Lu<sup>2</sup>

<sup>1</sup> Department of Physics, Department of Materials Science and Engineering, and Department of Biomedical Engineering, City University of Hong Kong, Hong Kong 999077, China

<sup>2</sup> Key Laboratory for Liquid-Solid Structural Evolution and Processing of Materials, Ministry of Education, and school of Materials Science and Engineering, Shandong University, Jinan 250061, China

Corresponding Author: Gui-yong Xiao

E-mail Address: xiaoguiyong@sdu.edu.cn (Gui-yong Xiao).

## 1.1 Materials

Oleic acid ( $C_{18}H_{34}O_2$ , AR) and Cerium (III) chloride heptahydrate ( $CeCl_3 \cdot 7H_2O$ , 99.9% metals basis) were purchased from Shanghai Aladdin Bio-Chem Technology Co., Ltd. (Shanghai, China). Ethanol absolute ( $C_2H_6O$ , AR), calcium chloride anhydrous ( $CaCl_2$ , AR), sodium hydroxide (NaOH, AR) and sodium dihydrogen phosphate dihydrate ( $NaH_2PO_4 \cdot 2H_2O$ , AR) were purchased from Sinopharm Chemical Reagent Co., Ltd. (Shanghai, China). Ultrapure water was used in throughout the experiments. All reagents were used without further purification.

## 1.2 Characterization

The phase constituents of the as-prepared products were identified by an X-ray diffractometer (XRD, Ultima IV, RIGAKU, Japan) with a Cu  $K\alpha$  radiation source ( $\lambda = 1.5418 \text{ \AA}$ ). The full width at half-maximum (FWHM) values and lattice parameters were obtained in Jade 6 software. The chemical compositions of the products were characterized using Fourier transform infrared spectroscopy (FTIR, Nexus 670, Thermo Nicolet, USA) with a resolution of  $4 \text{ cm}^{-1}$ . The binding energies were collected by X-ray photoelectron spectroscopy (XPS, AXIS Supra, Shimadzu, Japan) using monochromatic Al- $K\alpha$  radiation (600 W). The prominent C1s peak (284.8 eV) was used to calibrate the survey and high-resolution scans of Ce3d. All XPS spectra were analyzed by the Thermo Avantage software. The surface morphologies and element distribution of the samples were obtained using field-emission scanning electron microscope (FESEM, JSM-7800F, JEOL, Japan) equipped with an energy dispersive spectrometer (EDS, X-max 80, Oxford Instruments, UK). The high-resolution TEM (HRTEM) images and selected area electron diffraction (SAED) pattern of the 6CeHANF sample were explored by a field-emission transmission electron microscope (TEM, JEM-2100, JEOL, Japan).

The crystallite sizes ( $D_{hkl}$ ) of the as-prepared products were calculated by “Debye-Scherrer equation”<sup>1, 2</sup>. The

degree of crystallinity ( $X_c$ ) was calculated using<sup>3</sup>:

$$X_c = \left(1 - \frac{V_{112/300}}{I_{300}}\right) \times 100\%$$

where  $V_{112/300}$  was the intensity of the hollow between the (112) and (300) diffraction peaks and  $I_{300}$  was the intensity of the (300) diffraction peak.

## References

1. U. Holzwarth and N. Gibson, *Nature Nanotechnology*, 2011, **6**, 534.
2. M. Ghiyasiyan-Arani, M. Salavati-Niasari and S. Naseh, *Ultrasonics Sonochemistry*, 2017, **39**, 494-503.
3. E. Landi, A. Tampieri, G. Celotti and S. Sprio, *J. Eur. Ceram. Soc.*, 2000, **20**, 2377-2387.

Table S1. Summary of characteristics of the as-prepared samples synthesized with different Ce doping ratios.

| Sample  | Theoretical       | Ce/(Ce+Ca) of the | (Ce+Ca)/P of the | Crystallinity (%) | Lattice parameter |              |
|---------|-------------------|-------------------|------------------|-------------------|-------------------|--------------|
|         | Ce/(Ce+Ca) (at.%) | product (at.%)    | product          |                   | <i>a</i> (Å)      | <i>c</i> (Å) |
| 0CeHANF | 0                 | 0                 | 1.32             | 85.39             | 9.2228            | 7.1582       |
| 2CeHANF | 2                 | 7.60              | 1.21             | 95.94             | 9.2921            | 7.0286       |
| 4CeHANF | 4                 | 9.02              | 1.07             | 95.27             | 9.3685            | 7.0198       |
| 6CeHANF | 6                 | 14.27             | 1.05             | 92.12             | 9.3522            | 6.8836       |
| 8CeHANF | 8                 | 23.36             | 0.98             | 91.64             | 9.3613            | 6.8457       |

Note: Ce/(Ce+Ca) and (Ce+Ca)/P of the product were calculated based on their corresponding XPS data.

Table S2. XPS peak positions of Ce3d from the as-prepared products synthesized with different Ce doping ratios.

| Sample  | Ce <sup>3+</sup>  |        |                   |        | Ce <sup>4+</sup>  |        |                   |        |        |        |
|---------|-------------------|--------|-------------------|--------|-------------------|--------|-------------------|--------|--------|--------|
|         | 3d <sub>5/2</sub> |        | 3d <sub>3/2</sub> |        | 3d <sub>5/2</sub> |        | 3d <sub>3/2</sub> |        |        |        |
| 2CeHANF | 880.98            | 885.23 | 899.00            | 903.85 | 883.08            | 887.17 | 899.98            | 901.80 | 906.07 | 917.58 |
| 4CeHANF | 881.36            | 885.45 | 899.42            | 903.92 | 883.29            | 887.35 | 900.42            | 901.79 | 906.23 | 918.02 |
| 6CeHANF | 881.23            | 885.47 | 899.04            | 904.05 | 883.63            | 887.44 | 900.50            | 902.21 | 906.34 | 918.10 |
| 8CeHANF | 881.01            | 885.38 | 898.84            | 904.18 | 883.04            | 887.60 | 900.02            | 901.76 | 906.50 | 917.62 |

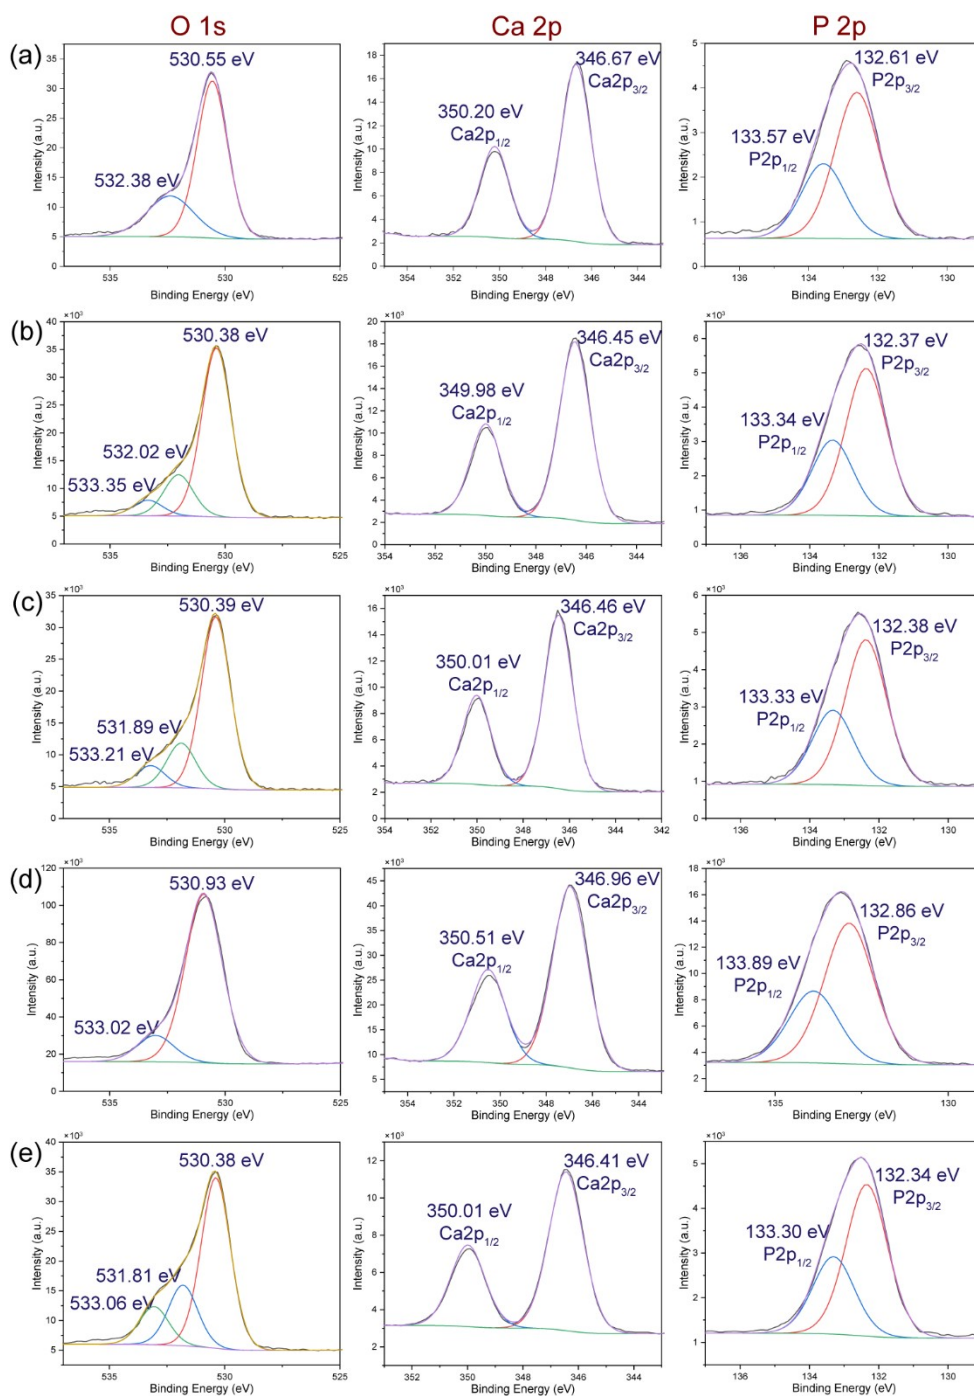

Figure S1. XPS high-resolution spectra of O1s, Ca2p, P2p of different samples. (a) 0CeHANF, (b) 2CeHANF, (c) 4CeHANF, (d) 6CeHANF, and (e) 8CeHANF.
